# Supplementary material for: Genetic structure of Australian glass shrimp,Paratya australiensis,in relation to altitude
Source: PeerJ journal article supplement (doi:10.7717/peerj.8139), 2020-01-09

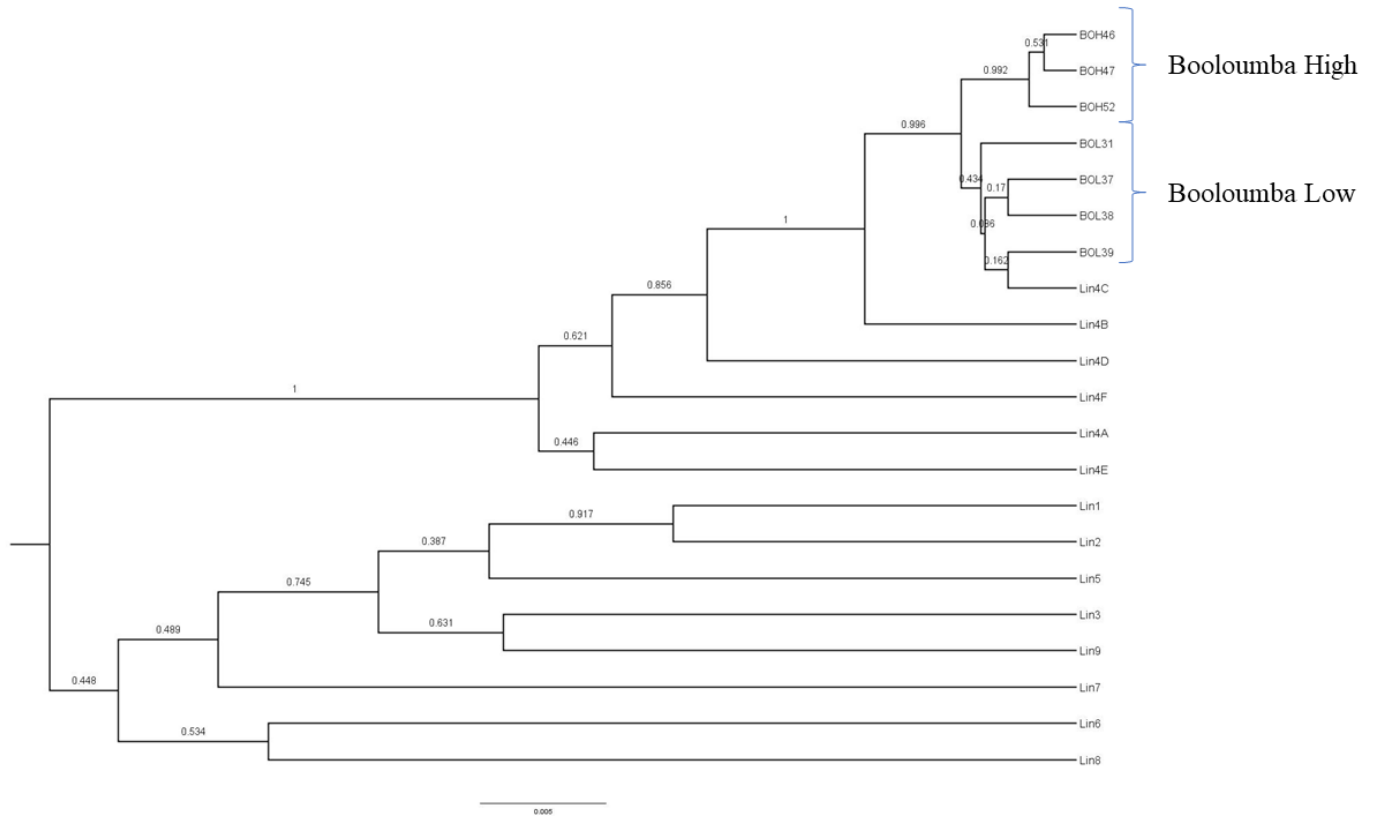

Supplement: Supplementary_Fig_3.pdf [file Supplementary_Fig_3.pdf]
