# Supplementary material for: Genetic structure of Australian glass shrimp, Paratya australiensis, in relation to altitude
Source: PeerJ. 2020 Jan 9;8:e8139. doi: 10.7717/peerj.8139 (PMC6955102; doi:10.7717/peerj.8139)
Supplement: Table S1 [file peerj-08-8139-s004.docx]

Table S1. List of Sample ID from different populations

| **Stream Name** | **Population Name** | **Sample ID** |
| --- | --- | --- |
| **Broken Bridge Creek** | **Broken Bridge High (BBH)** | BBH121 |
| BBH122 |
| BBH124 |
| BBH130 |
| BBH94 |
| BBH95 |
| BBH98 |
| BBH99 |
| BBH104 |
| BBH105 |
| BBH106 |
| BBH108 |
| BBH110 |
| BBH134 |
| BBH135 |
| BBH137 |
| BBH144 |
| BBH149 |
| BBH85 |
| **Broken Bridge Low (BBL)** | BBL215 |
| BBL238 |
| BBL250 |
| BBL218 |
| BBL239 |
| BBL251 |
| BBL152 |
| BBL220 |
| BBL244 |
| BBL252 |
| BBL160 |
| BBL224 |
| BBL245 |
| BBL253 |
| BBL203 |
| BBL230 |
| BBL246 |
| BBL254 |
| BBL208 |
| BBL233 |
| BBL247 |
| BBL255 |
| BBL212 |

Table S1. List of Sample ID from different populations (Cont.)

| **Stream Name** | **Population Name** | **Sample ID** |
| --- | --- | --- |
| **Broken Bridge Creek** | **Broken Bridge Low (BBL)** | BBL234 |
| BBL248 |
| BBL256 |
| BBL184 |
| BBL236 |
| BBL249 |
| **Booloumba Creek** | **Booloumba High (BOH)** | BOH11 |
| BOH13 |
| BOH15 |
| BOH19 |
| BOH20 |
| BOH24 |
| BOH34 |
| BOH35 |
| BOH36 |
| BOH53 |
| BOH59 |
| BOH62 |
| BOH64 |
| BOH67 |
| BOH69 |
| BOH75 |
| BOH77 |
| BOH79 |
| BOH82 |
| BOH83 |
| BOH84 |
| BOH85 |
| BOH86 |
| BOH87 |
| **Booloumba Low (BOL)** | BOL11 |
| BOL15 |
| BOL17 |
| BOL30 |
| BOL54 |
| BOL89 |
| BOL101 |
| BOL110 |
| BOL111 |
| BOL112 |
| BOL113 |
| BOL114 |

Table S1: List of Sample ID from different populations (Cont.)

| **Stream Name** | **Population Name** | **Sample ID** |
| --- | --- | --- |
| **Booloumba Creek** | **Booloumba Low (BOL)** | BOL115 |
| BOL116 |
| BOL119 |
| BOL120 |
| BOL121 |
| BOL123 |
| BOL125 |
| BOL126 |
| BOL127 |
| BOL128 |
| BOL129 |
| **Obi Obi Creek** | **Obi Obi High (OBH)** | OBH140 |
| OBH142 |
| OBH177 |
| OBH178 |
| OBH179 |
| OBH180 |
| OBH181 |
| OBH182 |
| OBH183 |
| OBH184 |
| OBH185 |
| OBH186 |
| OBH187 |
| OBH188 |
| OBH189 |
| OBH190 |
| OBH191 |
| OBH192 |
| OBH193 |
| **Obi Obi Low (OBL)** | OBL1 |
| 2 |
| 3 |
| 4 |
| 5 |
| 6 |
| 7 |
| 8 |
| 9 |
| 11 |

Table S1: List of Sample ID from different populations (Cont.)

| **Stream Name** | **Population Name** | **Sample ID** |
| --- | --- | --- |
| **Obi Obi Creek** | **Obi Obi Low** | OBL12 |
| OBL13 |
| OBL14 |
| OBL15 |
| OBL16 |
| OBL17 |
| OBL19 |
| OBL20 |
| OBL21 |
| OBL22 |
| OBL23 |
| OBL24 |
| OBL25 |
| OBL26 |
| OBL27 |
| OBL29 |
| OBL30 |
